# Supplementary material for: Improved survival analysis by learning shared genomic information from pan-cancer data
Source: PubMed Central journal article supplement — Bioinformatics. 2020 Jul 13;36(Suppl 1):i389–98. doi: 10.1093/bioinformatics/btaa462 (PMC7355236; doi:10.1093/bioinformatics/btaa462), 2020-07-13
Supplement: btaa462_supplementary_data.pdf [file btaa462_supplementary_data.pdf]

**Supplementary file for Kim et al. (2020), Improved survival analysis by learning shared genomic information from pan-cancer data**

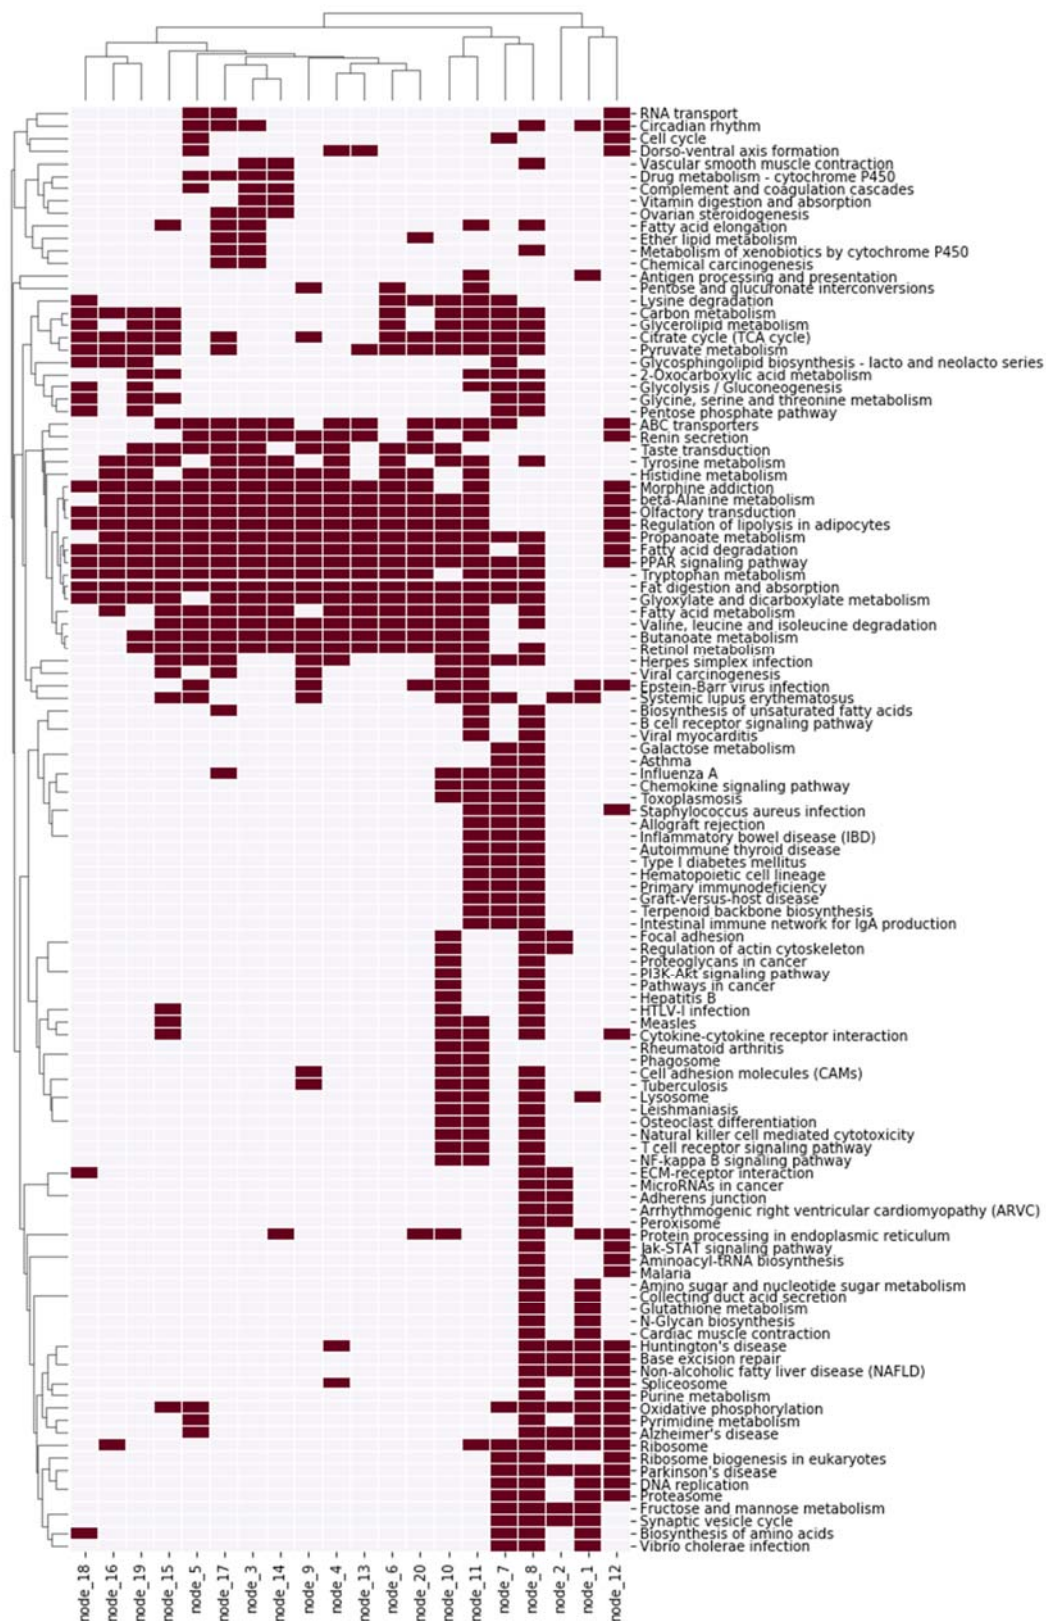

**Suppl. Fig S1.** Enriched KEGG pathways for each hidden node of the Cox layer in the BRCA dataset. The pathway enrichment test is conducted using the correlation values between a vector of hidden node and a vector of gene expression value across all BRCA samples.

| Group     | Hyperparameter                             | Size |
|-----------|--------------------------------------------|------|
| VAE       | number of nodes in first layer of encoder  | 4096 |
|           | number of nodes in second layer of encoder | 128  |
| Cox-model | number of nodes in first layer             | 12   |
|           | number of nodes in second layer            | 1    |
| Training  | batch size                                 | 1000 |
|           | learning rate                              | 1e-3 |
|           | weight decay                               | 1e-5 |
|           | dropout rate                               | 0.3  |
|           | model optimizer                            | Adam |
|           | activation function                        | Tanh |

**Suppl. Table S1.** Hyperparameters used to train VAECoX.
